# Supplementary material
Source: Research Square preprint supplement (doi:10.21203/rs.3.rs-9701383/v1)
Supplement: Supplementary file 1 [file 2dbf89af4f207d4d4ade0314.docx]

**CRediT Author Statement**

**Linus Friday Apeh:** Conceptualization, Methodology, Writing – Original Draft, Formal Analysis, Validation Software, Investigation,

**Jonathan Terseer Ikyumbur:** Conceptualization, Supervision, Writing – Original Draft, Formal analysis, Project Administration, Investigation, Writing – Original Draft, Validation,

**Frederick Gbaorun:** Resources, Supervision, Writing – Review & Editing

**Raymond Msughter Agaku:** Writing – Review & Editing

**Ode Samuel Omenka:** Writing – Review & Editing

All authors have read and agreed with the published version of the manuscript.
