# Supplementary material
Source: Research Square preprint supplement (doi:10.21203/rs.3.rs-9701383/v1)
Supplement: Supplementary file 2 [file f03925e81b838a6ad9029cfb.docx]

**Declaration of interests**

The authors declare that they have no known competing financial interests or personal relationships that could have appeared to influence the work reported in this paper.
